# Supplementary material
Source: PubMed Central journal article supplement (PMC2929719)
Supplement: JCI42391sd.pdf [file JCI42391sd.pdf]

## **SUPPORTING METHODS**

### **Array comparative genomic hybridization analysis**

Mouse 105k CGH array analysis was done using CGH Analytics 3.514 (Agilent). Aberration detection was accomplished using the ADM-1 algorithm (Lipson et al., 2006), with a threshold of 6. Centralization was used with a bin size of 10, and fuzzy zero correction was applied to minimize detection of segments with low absolute mean ratios. Recurrent aberrations in mouse data were defined using the T Test common aberration algorithm, utilizing an overlap threshold of 0.9. Genome build used for these analyses was mouse NCBI 36.

### **Gene expression array analysis**

Microarray normalization and expression analysis was done using Genespring 7.3 (Agilent). For Agilent mouse whole genome arrays, values below 0.01 were set to 0.01 and each measurement was divided by the 50th percentile of all measurements in that sample. Each gene was divided by the median of its measurements in all samples and if the median of the raw values was below 10 then each measurement for that gene was divided by 10 if the numerator was above 10, otherwise the measurement was thrown out. For Affymetrix HGU133A arrays, raw CEL files were preprocessed using robust multi-array average (RMA) method (Irizarry et al., 2003) and batch correction using distance weighted discrimination (Benito M et al 2004). Further, each gene was divided by the median of its measurements in all samples. If the median of the raw values was below 0.01 then each measurement for that gene was divided by 0.01 if the numerator was above 0.01, otherwise the measurement was thrown out. For response to chemotherapy, samples were ranked low to high according to the mean probe measurements for each gene in question, and then divided into groups at the 1<sup>st</sup> quartile or median.

Gene expression signatures were obtained using a welsh T Test, and the False Discovery Rate (Benjamini and Hochberg, 1995) was employed to adjust for multiple hypotheses, using a cutoff of 5%. Genes within each signature were counted on the basis of official gene symbols.

### **Integrative copy number and expression analysis**

For integrative analysis, multiple probes for each gene within the mouse 11qE1 deletion region were averaged and the correlation between these values and the mean log<sub>2</sub>ratio over the copy number interval that each gene occupies was determined using spearman's rank correlation coefficient.

### **Unsupervised clustering**

Hierarchical clustering (Pearson's correlation coefficient and average linkage) was performed using the 500 genes with the highest coefficient of variation. Genes with no data in half the starting conditions were discarded. Cluster stability: We first scaled the data by dividing the expression profiles of each sample by their root-mean-square. The root-mean-square is obtained by computing the square-root of the sum-of-squares of the non-missing values in the sample divided by the number of non-missing values minus one. We evaluated the cluster stability by repeatedly subsampling the data and comparing the cluster membership of the subsamples to the original clusters (Ben-Hur et al. 2002; Smolkin and Ghosh, 2003). We used "ward" as the agglomeration method in hierarchical clustering (see hclust in R (<http://www.r-project.org/>)). We did 5,000 permutations and 85% of genes were used in each subsample.

### **Class prediction**

A gene expression signature was obtained by comparing classes within the training samples (MOTO PKA<sup>+</sup> vs. PKA<sup>-</sup>) and this gene set was used for class prediction. K-means cluster analysis was done in R. First the training samples were clustered into k=2 clusters, and then the `kmeans.predict` function in R was used to assign the test samples to a group. Principle component analyses was done using mean centering and scaling. Hierarchical clustering used Pearson's correlation coefficient and average linkage.

### **Functional annotation of gene signatures**

Gene set enrichment was calculated using the hypergeometric test, or using EASE (DAVID bioinformatics database; Huang da et al., 2007) for annotation of over and underexpressed genes and for construction of functional clusters.

### **Databases**

Gene sets were collected from the GO database ([www.geneontology.org](http://www.geneontology.org)) and mSIG (<http://www.broad.mit.edu/gsea/msigdb/index.jsp>). Mouse-human orthologs were obtained from the Ensembl (53) Genes database. Human OSA gene expression data is available from NCBI Gene Expression Omnibus (<http://www.ncbi.nlm.nih.gov/geo/>) under the accession numbers GSE16088 and GSE16091.

---

**Supplemental methods Table S8. Applied Biosystems Gene Expression Assay catalogue numbers and sequences**

---

| Gene Name           | Catalogue number |
|---------------------|------------------|
| Prkaca              | Mm00660092_m1    |
| Prkar1a             | Mm00660315_m1    |
| Rankl               | Mm01313944_g1    |
| Opg                 | Mm01205928_m1    |
| Osteonectin         | Mm00486332_m1    |
| Osteopontin         | Mm00436767_m1    |
| Runx2               | Mm00501578_m1    |
| Col1a-1             | Mm01302047_g1    |
| Eukaryotic 18s rRNA | Hs99999901_s1    |

---

Custom Primers / Probes

---

| Gene Name            | Sequence                                            |
|----------------------|-----------------------------------------------------|
| SV40 large T-antigen |                                                     |
| Probe                | 5' - AAG CAA CTC CAG CCA TCC ATT CTT CTA TGT C - 3' |
| Forward              | 5' - TTT GGG CAA CAA ACA GTG TAG C - 3'             |
| Reverse              | 5' - AAT GTT TGG TTC TAC AGG CTC TGC - 3'           |
| Osteocalcin          |                                                     |
| Probe                | 5' - AGG AGG GCA ATA AG - 3'                        |
| Forward              | 5' - CTG ACA AAG CCT TCA TGT CCA - 3'               |
| Reverse              | 5' - GCG GGC GAG TCT GTT CAC TA - 3'                |

## Alkaline phosphatase

|         |                                         |
|---------|-----------------------------------------|
| Probe   | 5' - TAC TGG CGA CAG CAA G - 3'         |
| Forward | 5' - TTG TGC CAG AGA AAG AGA GAG A - 3' |
| Reverse | 5' - GTT TCA GGG CAT TTT TCA AGG T - 3' |

---

## References

Ben-Hur, A. Elisseeff and I. Guyon. A stability based method for discovering structure in clustered data. Pacific Symposium on Biocomputing, 2002.

Benjamini, Yoav; Hochberg, Yosef (1995). Controlling the false discovery rate: a practical and powerful approach to multiple testing. *Journal of the Royal Statistical Society, Series B (Methodological)* 57 (1): 289–300.

Huang da, W., Sherman, B.T., Tan, Q., Collins, J.R., Alvord, W.G., Roayaei, J., Stephens, R., Baseler, M.W., Lane, H.C., and Lempicki, R.A. (2007). The DAVID Gene Functional Classification Tool: a novel biological module-centric algorithm to functionally analyze large gene lists. *Genome biology* 8, R183.

Irizarry, R.A., Bolstad, B.M., Collin, F., Cope, L.M., Hobbs, B., and Speed, T.P. (2003). Summaries of Affymetrix GeneChip probe level data *Nucleic acids research* 31, e15.

Lipson, D., Aumann, Y., Ben-Dor, A., Linial, N., and Yakhini, Z. (2006). Efficient calculation of interval scores for DNA copy number data analysis. *J Comput Biol* 13, 215-228.

Smoklin M., Ghosh D. (2003) Cluster stability scores for microarray data in cancer studies. *BMC Bioinformatics*, 4:36.

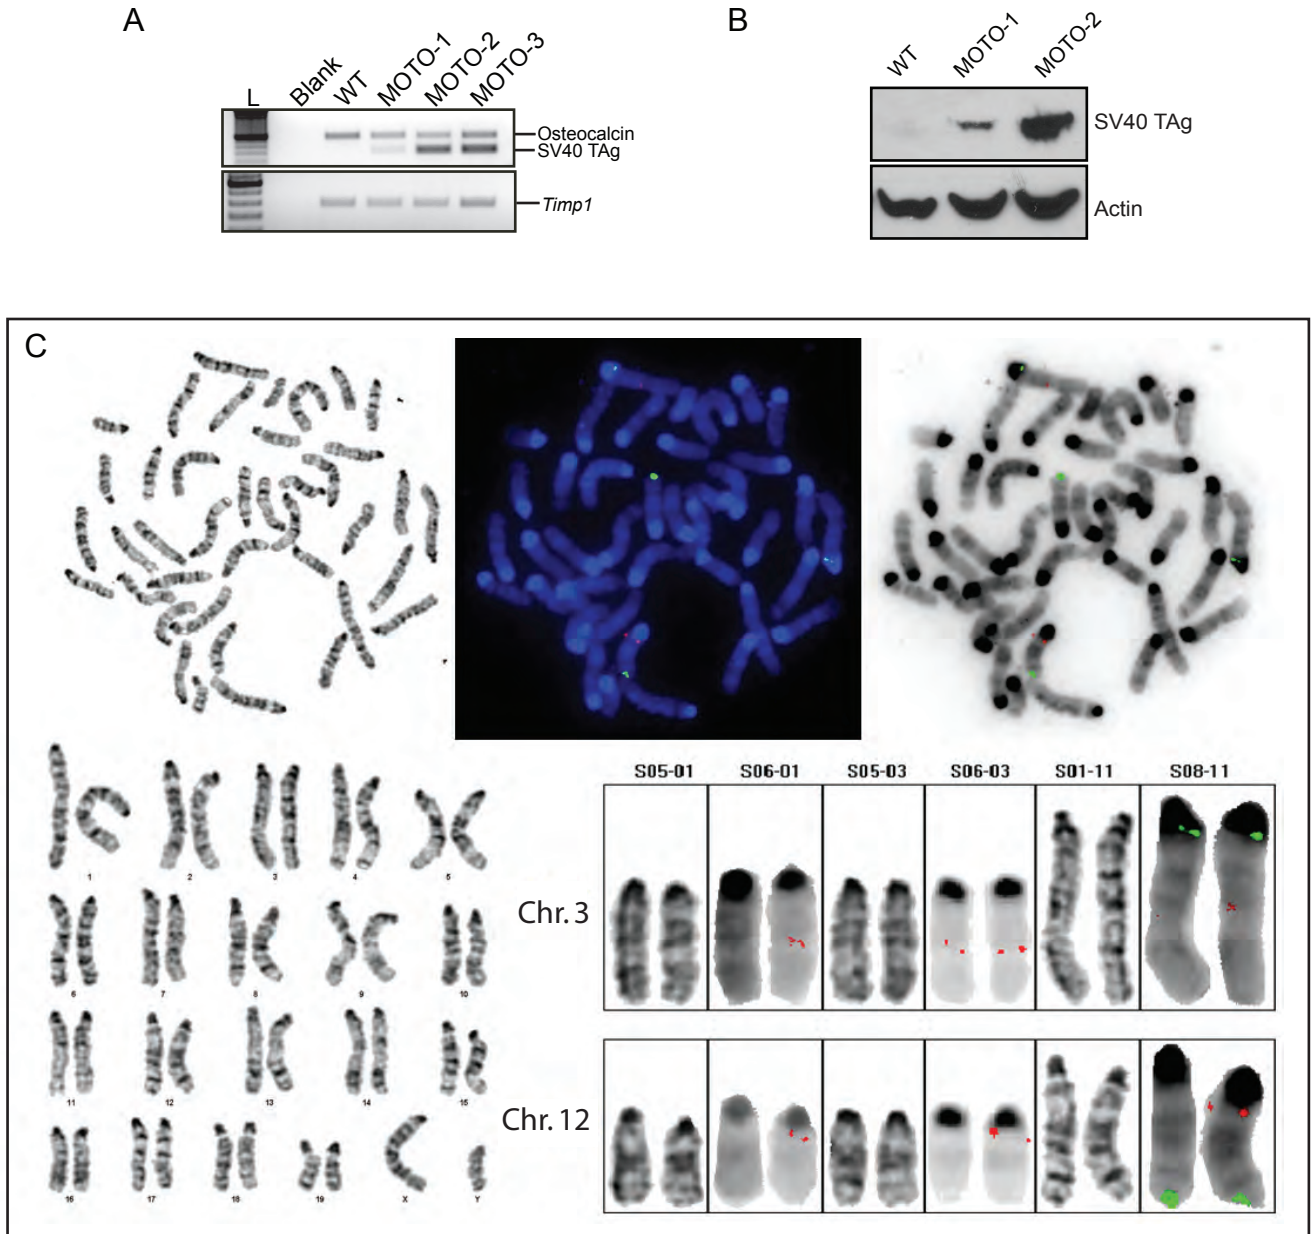

Figure S1. SV40-T-antigen Transgene Copy Number, Expression and Localization in MOTO

(A) OG2-Tag PCR of genomic DNA shows the relative transgenic copy number in male MOTO mice; 575bp, WT osteocalcin; 315bp transgene; 400bp, *Timp1* (endogenous copy number control). (B) Western blot of SV40 TAg in 15.4 week WT, MOTO-1 and 10.3 week MOTO-2 femurs. (C) OG2-SV40 transgene mapping using FISH on splenocytes from MOTO-1 mice identifies transgene insertion site at Chromosome 12qA-B1 and the endogenous OG2 promoter (*Bglap2*) at Chr3qE3-F1 (transgene probe = red signal). The identity of chromosomes 12 and 3 were confirmed using control probes specific for Chr 3qA1 and 12qF2 (green).



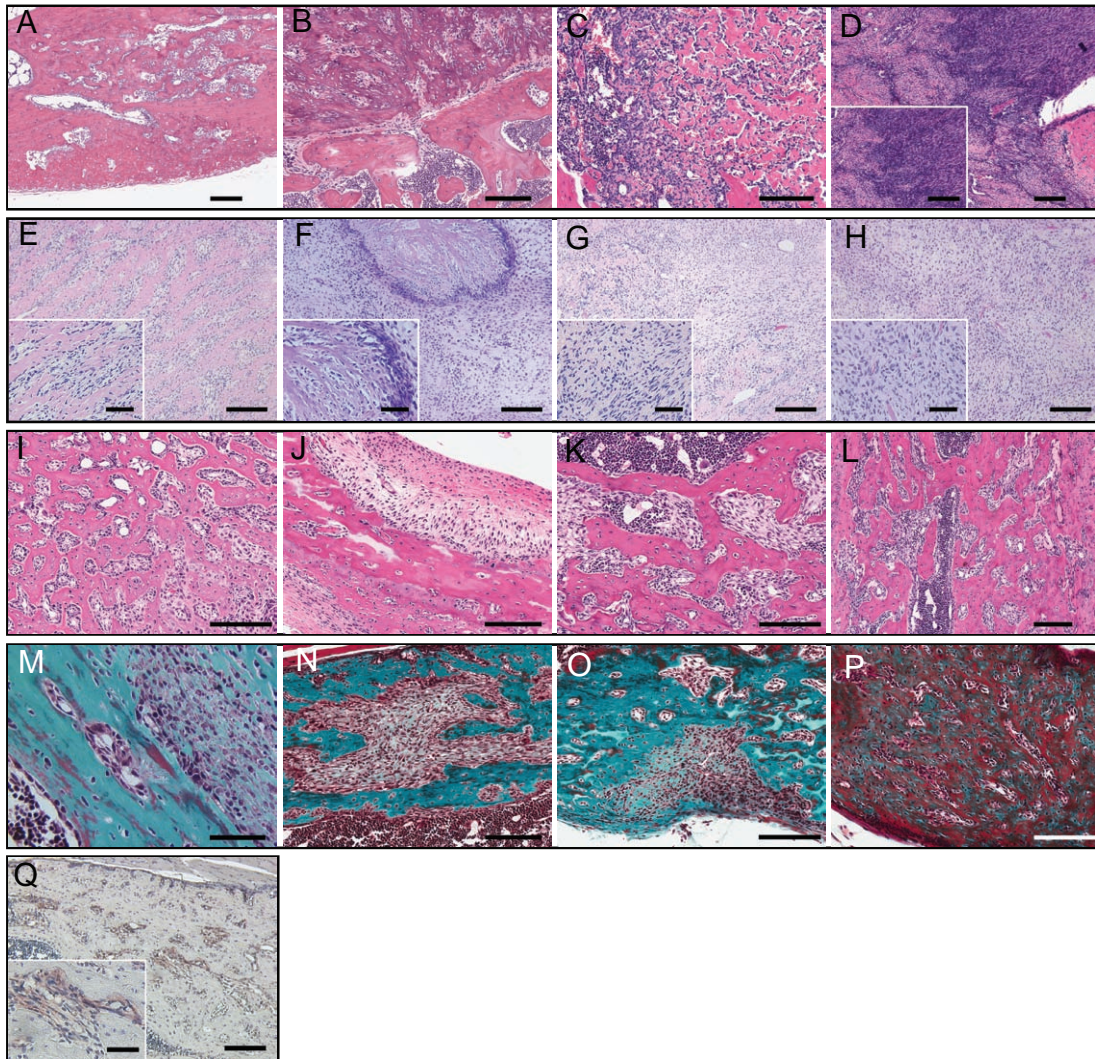

Figure S2. OSA Characterization in MOTO and *Prkar1a*<sup>ΔOB/+</sup>/MOTO<sup>+</sup> Mice

(A-D) Representative H&E stained OSA variants: MOTO mice exhibit a spectrum of bone neoplasms that vary in malignant appearance and site. (A) Benign well differentiated cortical growth in distal tibia. (B) Parosteal osteosarcoma: extracortical with only focal attachment to the periosteum of the tibia and no evidence of invasion. (C) Classical osteoblastic osteosarcoma originating in the femoral medulla that invades and replaces bone marrow and deposits osteoid. (D) Poorly differentiated fibroblastic osteosarcoma in femur that has destroyed regular bone structure but still produces some osteoid. (E-H) PKA<sup>+</sup> and PKA<sup>-</sup> mouse OSA subclasses show can not be distinguished histologically. Shown are H&E stained osteoblastic (E, F) and fibroblastic (G, H) osteosarcoma variants from representative end-stage (>20 weeks of age) tumours in the PKA<sup>-</sup> (E, G) and PKA<sup>+</sup> (F, H) subclasses. (I-L) H&E and (M-P) Masson's trichrome stained *Prkar1a*<sup>ΔOB/+</sup>/MOTO<sup>+</sup> tumors. Medullary tibia (I) humeral (L) and cortical femoral (K) tumors displaying the features of osteoblastic OSA with disorganized trabecular-like structures interspersed with neoplastic cells depositing osteoid. Tibial (N) and femoral (O) tumors having cellular areas that are more fibroblastic in appearance but that still deposit osteoid as evidenced by pale green trichrome staining (N). (J) Tumour of periosteal origin invading into cortex of distal tibia. Tibial (M, O) and humeral (P) tumours with osteoid deposition. Mice are 3.4-4.1 weeks of age. (Q) Alkaline phosphatase immunostaining of *Prkar1a*<sup>ΔOB/+</sup>/MOTO<sup>+</sup> humerus tumor showing positive osteoblasts (red).

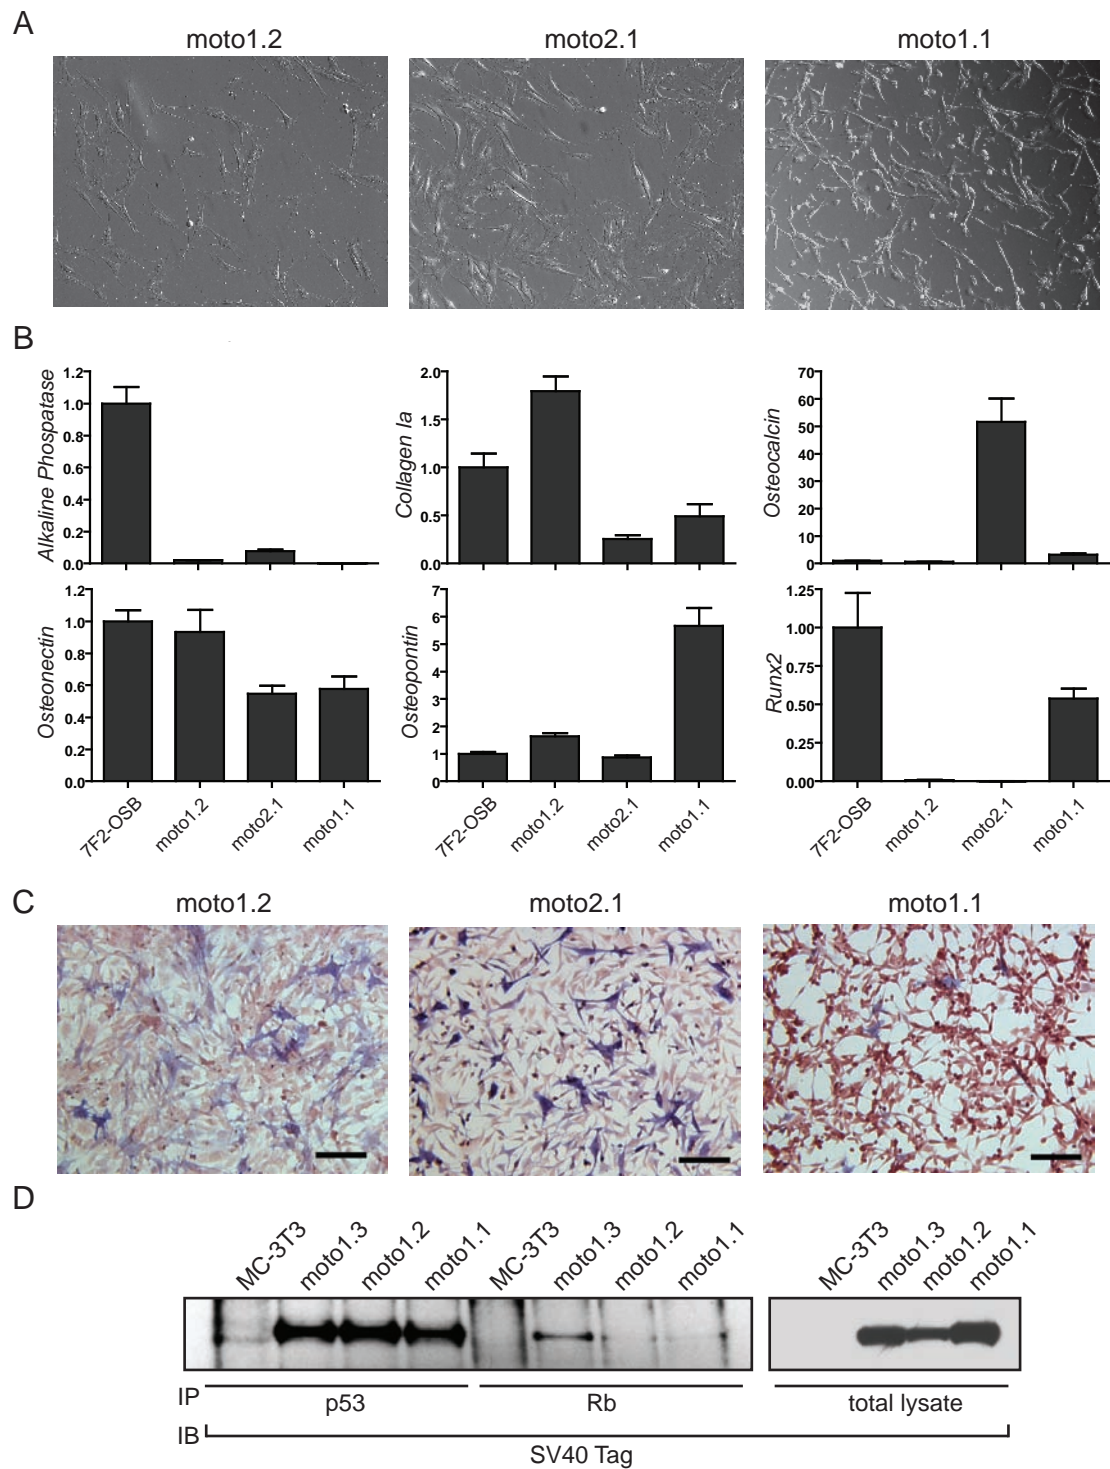

Figure S3. Markers of Osteoblastic Differentiation MOTO Tumor Cell Lines

The cell lines are numbered according to their MOTO founder line of origin followed by their order of derivation. 7F2-OSB is a control osteoblastic cell line. (A) Phase contrast light microscopy images of the three cell lines. The cells exhibit a fibroblastic morphology. (B) Relative qPCR showing expression of osteoblastic markers: alkaline phosphatase, collagen 1a1, osteocalcin, osteonectin, osteopontin and Runx2. Expression levels are normalized to endogenous 18S and are depicted relative to the values for the 7F2 osteoblastic cell line which was assigned a level of 1. Data are represented as mean $\pm$ SEM. (C) Alkaline phosphatase histochemical staining of cultured moto1.1, moto1.2, and moto2.1 cell lines. The blue cytoplasmic staining indicates the alkaline phosphatase activity. Scale bars are 30 $\mu$ m. (D) Western blot showing TAg co-immunoprecipitated with p53 or Rb protein, as indicated.



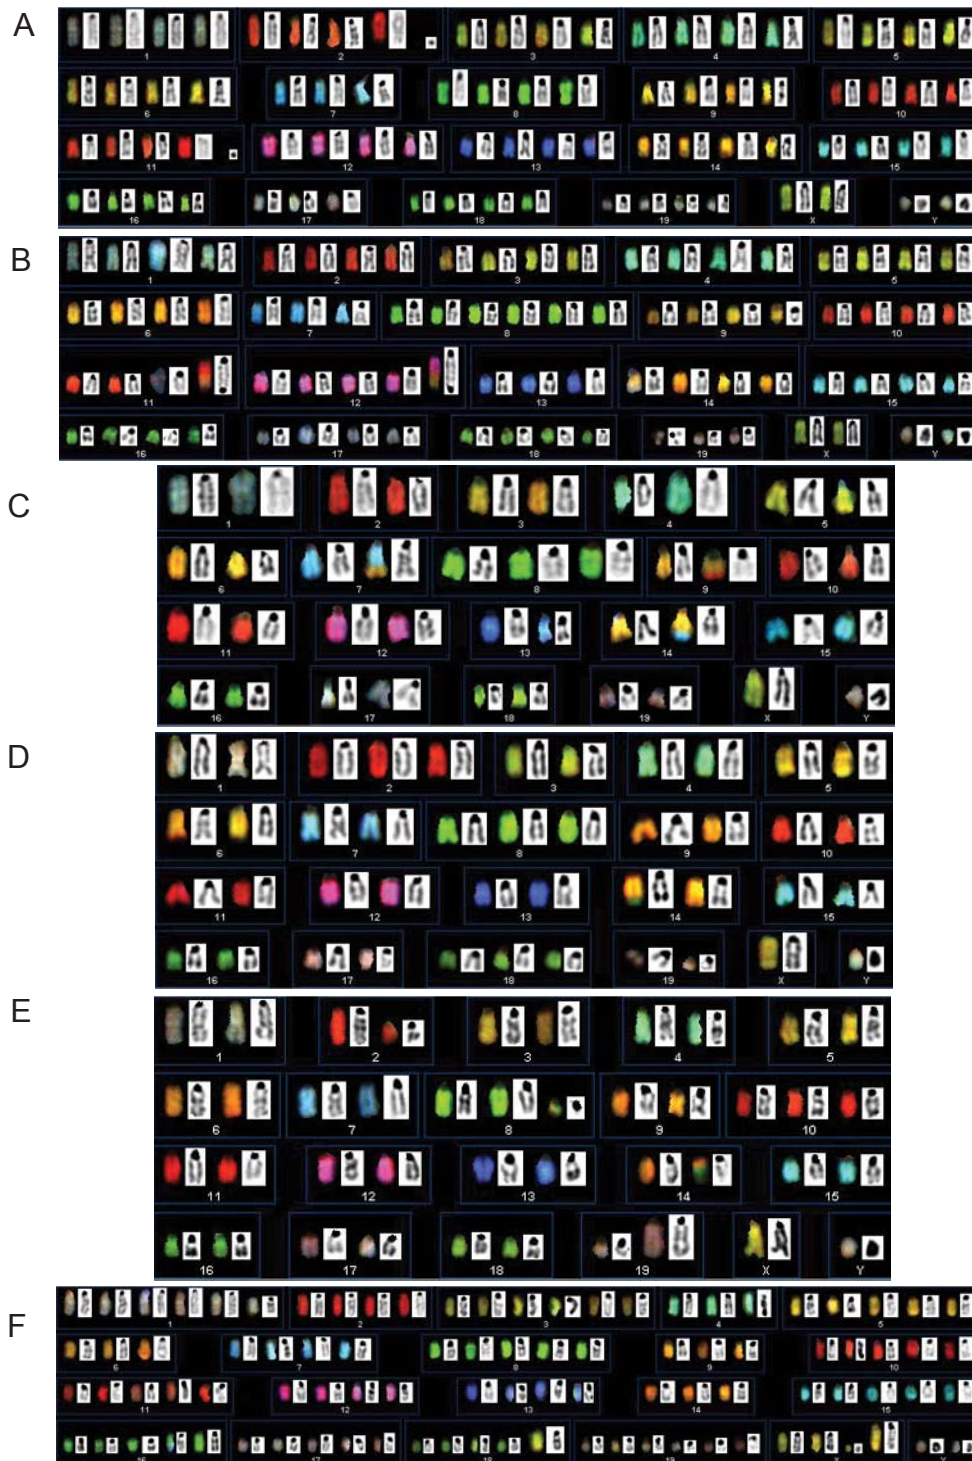

Figure S4. Karyotypic Complexity of OSA in the MOTO Model

Additional SKY analysis of MOTO OSA primary tumors and metastases. (A-B) MOTO-1 primary tumor exhibiting clonal numerical changes; gain of chr. 8 and high frequency of non-clonal structural changes (0.8/metaphase spread). Cells were diploid (10/20 cells) and tetraploid (10/20 cells). (C-E) MOTO-1 cell line displaying aneuploidy and structural rearrangements. (F) MOTO-1 tumor metastasis displaying aneuploidy and structural rearrangements. Cells were diploid (7/10 cells) and tetraploid (3/10 cells) with 0.3 rearrangements/metaphase spread.

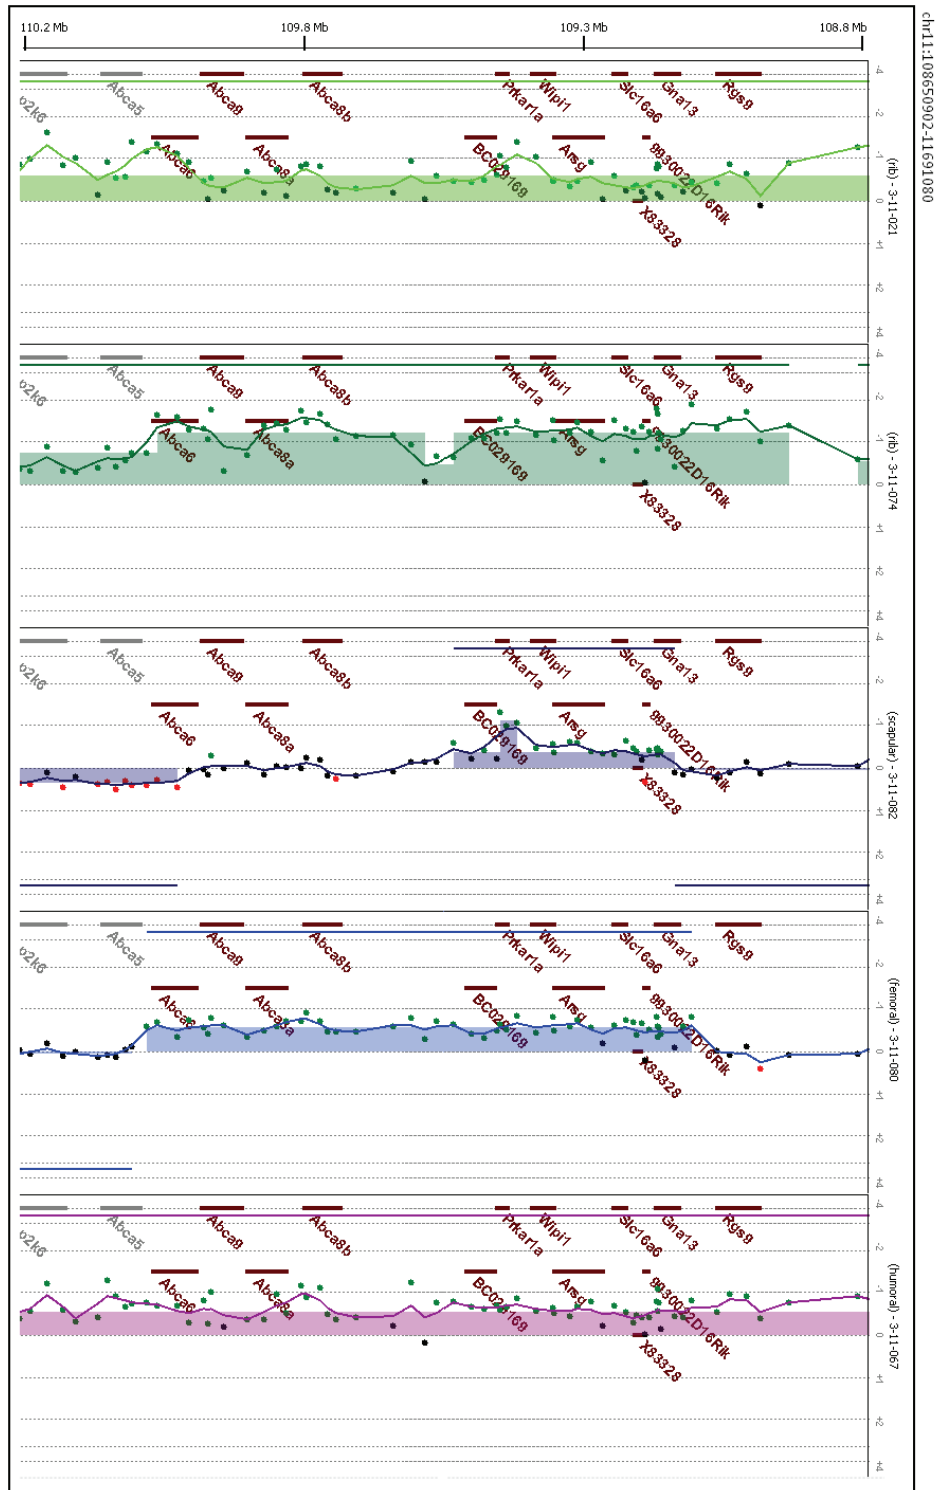

Figure S5. Recurrent Deletions at 11qE1 in MOTO Mouse Tumors

Array CGH plots at 11qE1 for individual MOTO OSA tumors bearing deletions containing *Rgs9*, *Gna13*, *9930022D16Rik*, *X83328*, *Slc16a6*, *Arsg*, *Wipi1*, *Prkar1a*, *BC029169*, *Abc8b*, *Abc8a*, *Abca9*, *Abca6*. Probes are smoothed using a 50kb moving average.

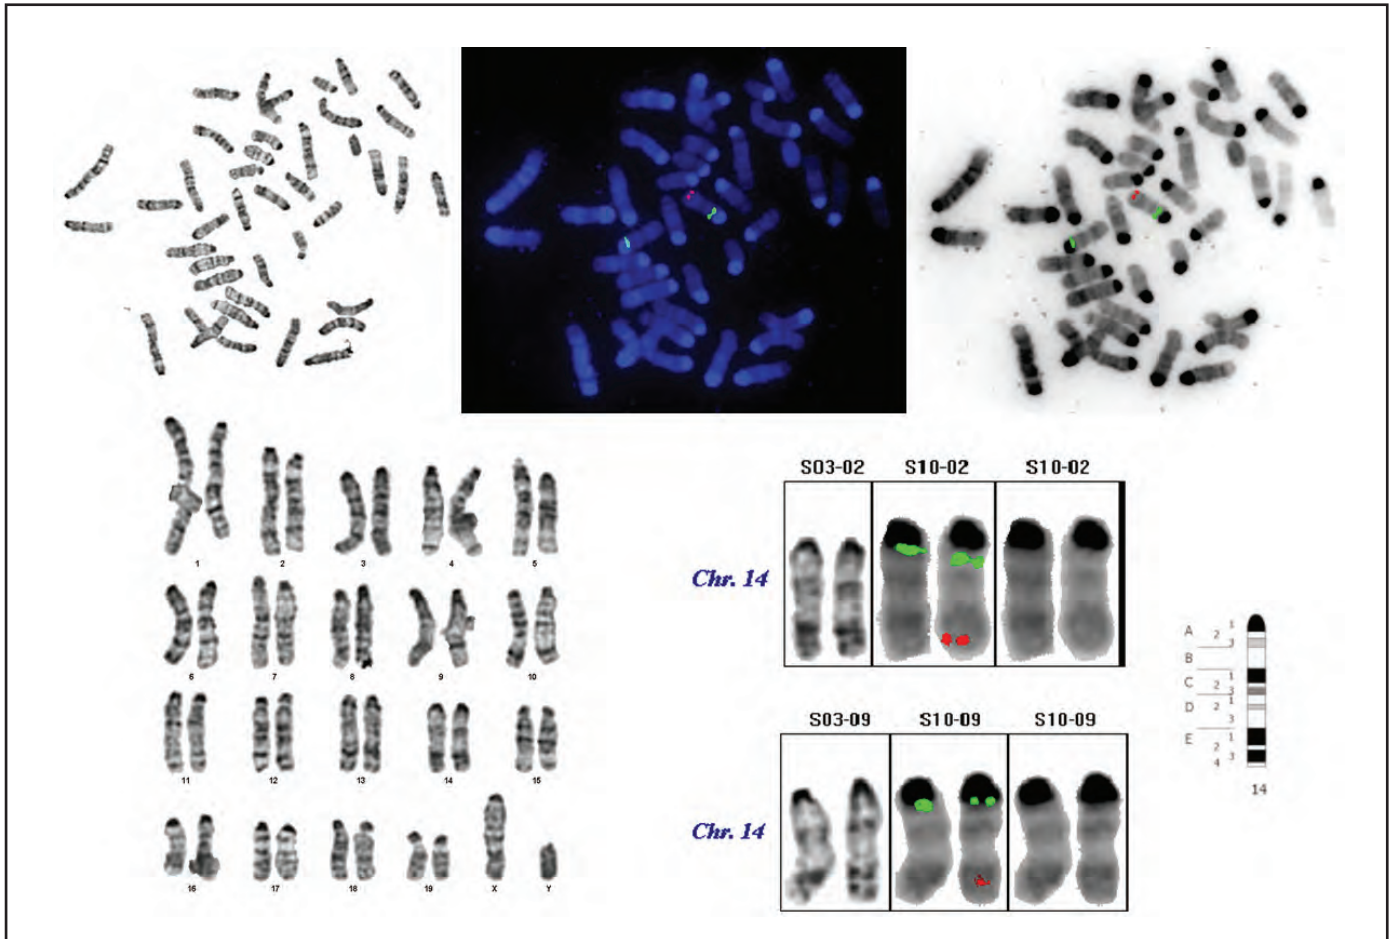

Figure S6. Cytogenetic Mapping of the *Colα(I)Cre* Transgene

Localization of the *Colα(I)Cre* transgene to chromosome 14qE2-4 using metaphase FISH analysis of mouse splenocytes and a Cre plasmid probe (red). The identity of Chr. 14 was confirmed by G-to-FISH using a control probe specific for 14qA1 (green).

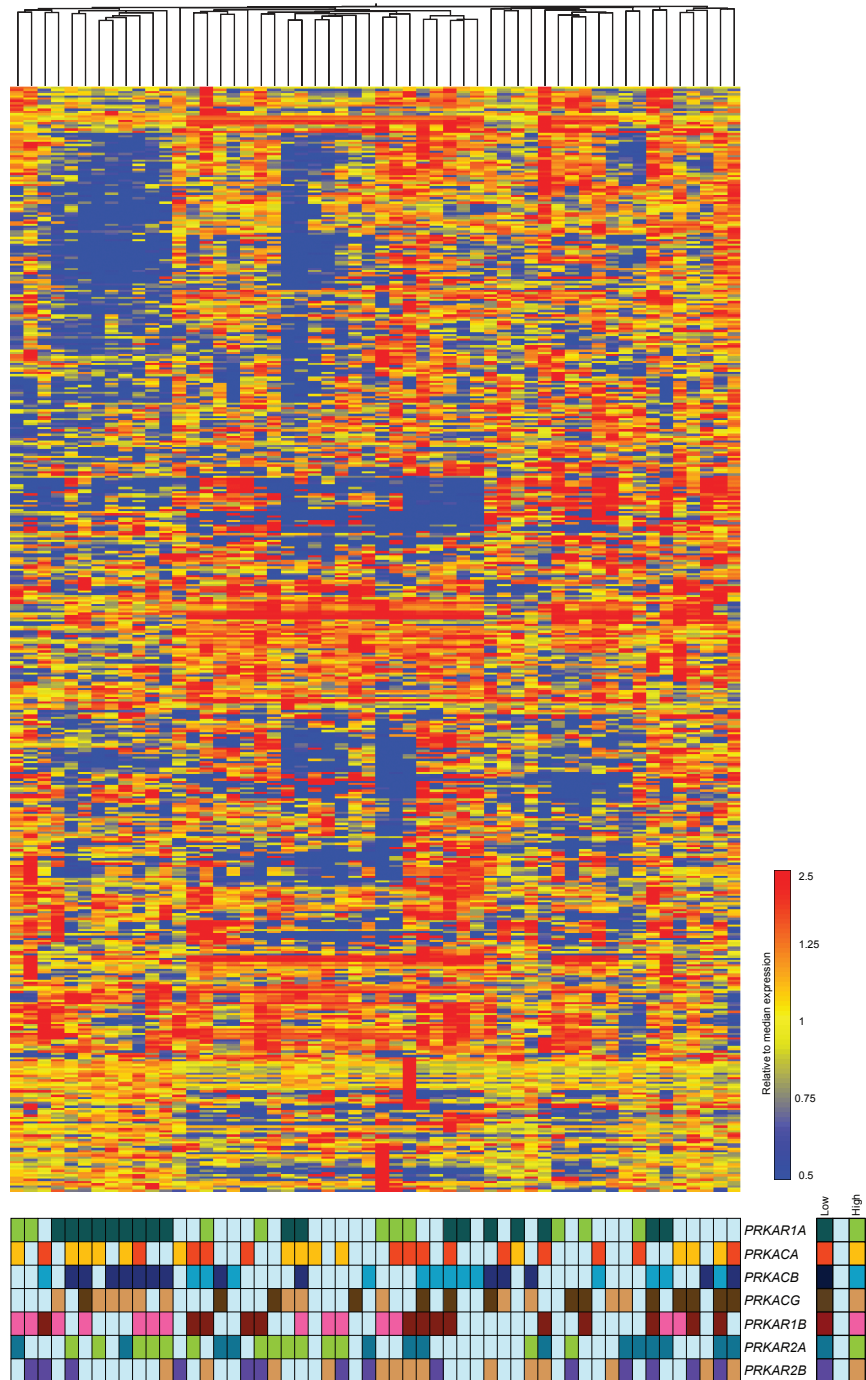

Figure S7. Unsupervised Analysis of Human OSA Expression Profiles

A subset of the cAMP/PKA/skeletal geneset with highly variant expression was used for hierarchical clustering and samples were annotated according to low or high expression for the all PKA holoenzyme gene subunits as indicated (below heatmap).

**Supplemental Table 1.** Incidence of spontaneous osteosarcoma metastasis in MOTO mice

|                                            | <i>MOTO-1</i> | <i>MOTO-2</i> |
|--------------------------------------------|---------------|---------------|
| <i>MOTO</i> <sup>+</sup> mice ( <i>n</i> ) | 99            | 95            |
| <i>Metastasis incidence</i>                | 95/99         | 95/95         |
| Lung                                       | 95            | 86            |
| Liver                                      | 23            | 56            |
| Kidney                                     | 19            | 19            |
| Spleen                                     | 0             | 2             |



**Supplemental Table 2.** Minimal common region analysis of deletions at 11qE1 in MOTO mouse OS

| <i>Chr</i> | <i>Start Index</i> | <i>End Index</i> | <i>No Of Probes</i> | <i>Start Position</i> | <i>End Position</i> | <i>Size (KB)</i> | <i>dir</i> | <i>Score</i> | <i>-log(p value)</i> |
|------------|--------------------|------------------|---------------------|-----------------------|---------------------|------------------|------------|--------------|----------------------|
| 11         | 4673               | 4675             | 3*                  | 109452262             | 109481052           | 28791            | -1         | -2.87        | 0.005583*            |
| 11         | 4611               | 4735             | 125                 | 108110250             | 111622519           | 3512270          | -1         | -2.75        | 0.007125             |
| 11         | 4651               | 4735             | 85                  | 109156656             | 111622519           | 2465864          | -1         | -2.6         | 0.009726             |
| 11         | 4611               | 4679             | 69                  | 108110250             | 109559639           | 1449390          | -1         | -2.58        | 0.01006              |
| 11         | 4679               | 4679             | 1                   | 109559239             | 109559639           | 401              | -1         | -2.53        | 0.01118              |
| 11         | 4641               | 4645             | 5                   | 108742029             | 108875414           | 133386           | -1         | -2.52        | 0.01134              |
| 11         | 4611               | 4716             | 106                 | 108110250             | 110466143           | 2355894          | -1         | -2.47        | 0.0126               |
| 11         | 4699               | 4701             | 3                   | 110026031             | 110077335           | 51305            | -1         | -2.19        | 0.02203              |
| 11         | 4660               | 4660             | 1                   | 109235585             | 109235985           | 401              | 1          | 2.17         | 0.02268              |
| 11         | 4651               | 4716             | 66                  | 109156656             | 110466143           | 1309488          | -1         | -2.17        | 0.02287              |
| 11         | 4651               | 4701             | 51                  | 109156656             | 110077335           | 920680           | -1         | -2.16        | 0.02303              |
| 11         | 4651               | 4679             | 29                  | 109156656             | 109559639           | 402984           | -1         | -2.1         | 0.02617              |
| 11         | 4646               | 4700             | 55                  | 108991847             | 110060584           | 1068738          | -1         | -2.08        | 0.02685              |
| 11         | 4646               | 4679             | 34                  | 108991847             | 109559639           | 567793           | -1         | -2.02        | 0.03015              |
| 11         | 4699               | 4700             | 2                   | 110026031             | 110060584           | 34554            | -1         | -1.88        | 0.03944              |
| 11         | 4702               | 4723             | 22                  | 110102627             | 110825631           | 723005           | -1         | -1.84        | 0.04217              |
| 11         | 4641               | 4653             | 13                  | 108742029             | 109184920           | 442892           | -1         | -1.79        | 0.0459               |

\* deletion contains only Prkar1a
